# Supplementary material for: Geometric estimation of volcanic eruption column height from GOES-R near-limb imagery – Part 2: Case studies
Source: Copernicus journal article supplement (doi:10.5194/acp-2021-156), 2021-03-23
Supplement: Supplementary file 2 [file acp-2021-156-supplement.zip]

Archive with 9 entries (9 files):
- supplement_part2.pdf
- supplementary_animation1.mp4
- supplementary_animation2.mp4
- supplementary_animation3.mp4
- supplementary_animation4.mp4
- supplementary_animation5.mp4
- supplementary_animation6.mp4
- supplementary_animation7.mp4
- supplementary_animation8.mp4
